1

2

3

Pregnancy-associated plasma protein-aa promotes neuron survival by regulating mitochondrial

4

function

5

6

Mroj Alassaf<sup>1,2</sup>, Emily Daykin<sup>1</sup>, and Marc Wolman<sup>1\*</sup>

7

1. Department of Integrative Biology. University of Wisconsin, Madison, Wisconsin, United States of America

8

9

2. Neuroscience Training Program. University of Wisconsin, Madison, Wisconsin, United States of America

10

11

12

13

Corresponding Author:

14

Marc Wolman

15

213 Zoology Research Building

16

1117 W. Johnson Street

17

Madison, WI 53706

18

[mawolman@wisc.edu](mailto:mawolman@wisc.edu)

19

608-890-1962

## 20 **Abstract**

21 A neuron's longevity is regulated by both extracellular molecular factors and the regulation of its  
22 intracellular functions, including mitochondrial activity. It remains poorly understood which  
23 extracellular factors promote neuron survival by influencing mitochondrial function. Through  
24 zebrafish mutant analysis, we reveal a novel extracellular neuronal survival factor: Pregnancy-  
25 associated plasma protein-aa (Pappaa). Neurons in *pappaa* mutant larvae die precociously and exhibit  
26 multiple mitochondrial defects, including elevated mitochondrial calcium, membrane potential, and  
27 reactive oxygen species production (ROS). In *pappaa* mutants, neuron loss is exacerbated by  
28 stimulation of mitochondrial calcium load or ROS production and suppressed by exposure to a  
29 mitochondrial ROS scavenger. As a secreted metalloprotease, Pappaa stimulates local insulin-like  
30 growth factor 1 (IGF1) signaling; a known regulator of mitochondrial function and neuron survival. In  
31 *pappaa* mutants, neurons show reduced IGF1-receptor activity and neuron loss is attenuated by  
32 stimulation of IGF1 signaling. These results suggest Pappaa-IGF1 signaling promotes neuron survival  
33 by regulating mitochondrial function.

## 34 **Introduction**

35 Without a sufficient regenerative capacity, a nervous system's form and function critically depends  
36 on molecular and cellular mechanisms that promote neuron longevity. A neuron's survival is  
37 challenged by its own energy demands. Considerable energy is required for basic neuron functions,  
38 including maintaining membrane potential, propagating electrical signals, and coordinating the release  
39 and uptake of neurotransmitters (Halliwell, 2006; Kann and Kovács, 2007; Howarth et al., 2012). A  
40 neuron's metabolic energy is primarily supplied by mitochondrial oxidative phosphorylation, a process  
41 in which the flow of electrons across the electron transport chain produces adenosine triphosphate  
42 (ATP) (Kann and Kovács, 2007). Although this process is essential to neuron survival, a consequence  
43 of mitochondrial oxidative phosphorylation is the generation of cytotoxic reactive oxygen species  
44 (ROS). The oxidative stress caused by ROS accumulation damages vital cell components including  
45 DNA, proteins, and lipids (Schieber and Chandel, 2014). Neurons are particularly vulnerable to  
46 oxidative stress due not only to their energy needs and thereby ROS production, but also to their  
47 relatively insufficient antioxidant capacity compared to other cell types (Halliwell, 1992). Cumulative  
48 oxidative stress can yield neuron loss, as observed in aging and neurodegenerative disorders including  
49 Alzheimer's disease (AD), Parkinson's disease (PD), and Amyotrophic lateral sclerosis (ALS) (Perry  
50 et al., 2002; Barber et al., 2006; Mattson and Magnus, 2006; Blesa et al., 2015). Thus, regulation of  
51 mitochondrial ROS production and a neuron's capacity to minimize oxidative stress, are critical  
52 determinants of neuron survival.

53 The insulin-like growth factor-1 (IGF1) signaling pathway is known to affect a neuron's  
54 mitochondrial function and its survival. Inhibition of IGF1 signaling causes loss of hippocampal  
55 neurons (Luo et al., 2003) and reduced IGF1 signaling has been shown to disrupt mitochondrial  
56 function, biogenesis, and ROS production (Lyons et al., 2017). Such mitochondrial defects are  
57 detrimental to neuron survival (Schon and Manfredi, 2003; Golpich et al., 2017). Coincident with age-

58 related neuron loss, IGF1 levels decrease (Hammerman, 1987). In humans, low IGF1 levels show  
59 comorbidity with brain atrophy and dementia in AD, whereas high IGF1 levels are associated with  
60 decreased risk of AD dementia and greater brain volume (Westwood et al., 2014)- In rat models of  
61 aging, old rats show reduced IGF1 and exhibit mitochondrial dysfunction, oxidative damage, and  
62 increased expression of pro-apoptotic genes in the brain. Exogenous IGF1 treatment reverses these  
63 outcomes (García-Fernández et al., 2008) and has also been demonstrated to protect motor neurons and  
64 delay symptomatic progression in a mouse model of ALS (Sakowski et al., 2009). Combined, these  
65 findings implicate IGF1 signaling in supporting neuron survival by regulating mitochondrial function  
66 and suggest that modulating IGF1 signaling has therapeutic potential for neurodegenerative disease.

67 It remains poorly understood how endogenous IGF1 signaling is regulated to influence a neuron's  
68 survival and mitochondrial activity. IGF1 is synthesized both in the liver for systemic distribution and  
69 locally in tissues, including the nervous system (Bondy et al., 1992; Sjögren et al., 1999). IGF1's  
70 biological functions are mediated by binding to cell membrane bound IGF1 receptors (IGF1Rs), which  
71 act as receptor tyrosine kinases. When bound by IGF1, the IGF1R autophosphorylates and stimulates  
72 intracellular PI3kinase-Akt signaling (Feldman et al., 1997). Extracellularly, IGF1 is sequestered by  
73 IGF binding proteins (IGFBPs), which restricts IGF1-IGF1R interactions (Hwa et al., 1999). Given  
74 that exogenous IGF1 supplementation can suppress neuron loss (Zheng et al., 2000; Hayashi et al.,  
75 2013), the extracellular factors that regulate IGF1 bioavailability may be critical determinants of a  
76 neuron's survival and mitochondrial function. In proximal tubular epithelial cells, IGFBP-3  
77 overexpression has been shown to increase oxidative stress and cell death. Conversely, in these cells  
78 knockdown of IGFBP-3 has been shown to suppress toxin-induced oxidative stress and thereby promote  
79 cell survival (Yoo et al., 2011). It is currently unknown whether modulation of IGFBPs, and therefore  
80 IGF1 bioavailability, also affects neuron survival and mitochondrial function.

81 To counter the negative regulatory role of IGFBPs, locally secreted proteases cleave IGFBPs to  
82 “free” IGF1 and thereby stimulate local IGF1 signaling. One such protease, called Pregnancy-  
83 associated plasma protein A (Pappaa), has been shown to target a subset of IGFBPs and stimulate  
84 multiple IGF1-dependent functions, including synapse formation and function (Boldt and Conover,  
85 2007; Miller et al., 2018). It remains unclear whether Pappaa acts as an extracellular regulator of IGF1-  
86 dependent neuron survival, mitochondrial function, or oxidative stress. Here, through analysis of a  
87 zebrafish *pappaa* mutant, we characterize defects in the survival and mitochondrial function of hair  
88 cell sensory neurons and spinal motor neurons. These results reveal a novel role for Pappaa in  
89 regulating a neuron’s mitochondrial function and oxidative stress to promote neuron survival.

90

## 91 **Results**

### 92 **Pappaa regulates survival of hair cell sensory neurons**

93 Zebrafish *pappaa* mutants (hereafter referred to as *pappaa*<sup>p170</sup>) were originally identified based on  
94 aberrant behavioral responses to acoustic stimuli (Wolman et al., 2015). In characterizing this  
95 phenotype, we assessed the morphology of hair cell sensory neurons, which mediate detection of  
96 acoustic stimuli by the inner ear and lateral line sensory organs. Hair cells of the lateral line are  
97 clustered into superficially positioned structures called neuromasts (Ghysen and Dambly-Chaudière,  
98 2007) (Fig 1a). At 5 days post fertilization (dpf), *pappaa*<sup>p170</sup> larvae hair cells appeared morphologically  
99 indistinguishable from wildtype (Fig 1b). To assess the contribution of hair cell function to the  
100 *pappaa*<sup>p170</sup> larvae’s behavioral defects, we briefly exposed 5 dpf *pappaa*<sup>p170</sup> and wild type larvae to  
101 neomycin, an aminoglycoside that kills hair cells of the lateral line by disrupting mitochondrial  
102 function (Esterberg et al., 2014; Esterberg et al., 2016). 4 hours after neomycin exposure, hair cells of  
103 *pappaa*<sup>p170</sup> larvae showed a greater reduction compared to wild type hair cells, suggesting an increased  
104 sensitivity to neomycin (Fig 1c-d). Support cells, which surround the hair cell rosettes in each

105 neuromast (Ghysen and Dambly-Chaudière, 2007; Thomas et al., 2015), were unaffected by neomycin  
106 exposure (S1a-b Fig). Next, we asked whether Pappaa deficiency yielded naturally occurring hair cell  
107 death (i.e. without neomycin treatment). To address this, we evaluated the number of hair cells per  
108 neuromast from 5-12 dpf. Within this period, we observed an increase in hair cells in wild type larvae,  
109 but not in *pappaa*<sup>p170</sup> larvae (Fig 1e). Because hair cells regenerate in zebrafish (Harris et al., 2003),  
110 even in *pappaa*<sup>p170</sup> (S2a Fig), a failure of *pappaa*<sup>p170</sup> hair cells to increase in number suggests their  
111 natural degeneration.

### 112 **Pappaa is expressed by neuromast support cells and motor neurons**

113 To begin to characterize how Pappaa regulates hair cell survival we evaluated *pappaa* mRNA  
114 expression in lateral line hair cells and their surrounding environment. *In situ* hybridization revealed  
115 *pappaa* expression in lateral line neuromasts with clear expression in the support cells (Fig 2a-b). To  
116 determine whether hair cells also express *pappaa* we performed RT-PCR on fluorescently sorted hair  
117 cells from 5 dpf *Tg(brn3c:GFP)*(Xiao et al., 2005) larvae (Fig 2c). We did not observe *pappaa*  
118 expression by hair cells, suggesting that support cells express *pappaa* to influence hair cell survival.  
119 The *in situ* analysis also indicated *pappaa* expression in the ventral spinal cord, where motor neurons  
120 reside (Fig 2a). RT-PCR of fluorescently sorted motor neurons from 5 dpf *Tg(mnx1:GFP)*(Rastegar et  
121 al., 2008) larvae confirmed *pappaa* expression by motor neurons (Fig 2c).

122

### 123 **Pappaa acts through IGF1R signaling to promote neuron survival**

124 A role for Pappaa in neuron survival is novel. Therefore, we sought to characterize the molecular  
125 pathway by which Pappaa affects neuron survival. Pappaa is a secreted metalloprotease that cleaves  
126 IGFBPs and therefore increases local IGF1 availability and activation of IGF1 receptors (IGF1Rs)  
127 (Boldt and Conover, 2007). Neuronal functions of Pappaa, including synapse formation and function,  
128 have been shown to be IGF1R signaling dependent (Wolman et al., 2015; Miller et al., 2018).

129 *pappaa*<sup>p170</sup> mutants harbor a nonsense mutation upstream of Pappaa's proteolytic domain and show  
130 reduced IGF1R activation in other neural regions of *pappaa* expression (Wolman et al., 2015; Miller et  
131 al., 2018). To determine whether *pappaa*<sup>p170</sup> hair cells show reduced IGF1R activity, we  
132 immunolabeled wild type and *pappaa*<sup>p170</sup> larvae for phosphorylated IGF1Rs (pIGF1R) (Chablais and  
133 Jazwinska, 2010). In *pappaa*<sup>p170</sup> larvae, we observed a reduction in pIGF1R immunolabeling of  
134 *pappaa*<sup>p170</sup> hair cells compared to wild type hair cells (Fig 3a-c).

135 We next asked whether Pappaa acts via IGF1R signaling to promote hair cell survival. We  
136 hypothesized that if Pappaa acts through IGF1R signaling, then attenuating IGF1R activity would  
137 reduce hair cell survival following neomycin exposure. To test this hypothesis, we treated wild type  
138 larvae with a selective inhibitor of IGF1R phosphorylation, NVP-AEW541 (Chablais and Jazwinska,  
139 2010), for 24 hours prior to and during 1 $\mu$ M neomycin exposure. 1 $\mu$ M neomycin alone did not induce  
140 hair cell death (Figs 1c and 3d); however, larvae pre-treated with NVP-AEW541 showed significant  
141 hair cell loss after 1 $\mu$ M neomycin exposure (Fig 3d). Next, we hypothesized that if Pappaa acts  
142 through IGF1R signaling, then stimulating either IGF1 availability or a downstream effector of the  
143 IGF1R would improve hair cell survival in *pappaa*<sup>p170</sup> larvae. To test this hypothesis, we bathed wild  
144 type and *pappaa*<sup>p170</sup> larvae in recombinant human IGF1 protein or a small molecule activator of Akt  
145 (SC79), a canonical downstream effector of IGF-1R signaling (Laviola et al., 2007). Pre-treatment  
146 with IGF1 or SC79 for 24 hours prior to and during neomycin exposure improved hair cell survival in  
147 *pappaa*<sup>p170</sup> larvae (Fig 3e-f). Together, these results suggest that Pappaa promotes hair cell survival by  
148 stimulating IGF1R signaling.

149

## 150 **Pappaa loss causes increased mitochondrial ROS in hair cells**

151 To define how Pappaa activity influences neuron survival, we evaluated known mechanisms  
152 underlying neomycin-induced hair cell death. Neomycin enters hair cells via mechanotransduction

153 (MET) channels found on the tips of stereocilia (Alharazneh et al., 2011). We hypothesized that  
154 *pappaa<sup>p170</sup>* hair cells may be more susceptible to neomycin-induced death due to an increase in MET  
155 channel-mediated entry. To assess entry via MET channels we compared uptake of FM1-43, a  
156 fluorescent styryl dye that enters cells through MET channels (Meyers et al., 2003). FM1-43  
157 fluorescence was equivalent between wild type and *pappaa<sup>p170</sup>* hair cells (Fig 4a-b), suggesting that the  
158 increased death of *pappaa<sup>p170</sup>* hair cells was not due to increased neomycin entry.

159 We therefore hypothesized that Pappaa affects essential organelle functions in hair cells. Within the  
160 hair cell, neomycin triggers Ca<sup>2+</sup> release from the endoplasmic reticulum (ER), which is then taken up  
161 by mitochondria (Esterberg et al., 2014). This Ca<sup>2+</sup> transfer results in stimulation of the mitochondrial  
162 respiratory chain, increased mitochondrial transmembrane potential, and an ensuing increase in ROS  
163 production (Gorlach et al., 2015; Esterberg et al., 2016). The oxidative stress caused by high ROS  
164 levels ultimately underlies the neomycin-induced hair cell death. To explore whether excessive ROS  
165 production underlies *pappaa<sup>p170</sup>* hair cells' increased sensitivity to neomycin, we evaluated  
166 cytoplasmic ROS levels with a live fluorescent indicator of ROS (CellROX) (Esterberg et al., 2016).  
167 *pappaa<sup>p170</sup>* hair cells displayed elevated ROS levels at baseline; prior to addition of neomycin (Fig 4c-  
168 d). Given that the mitochondria are the primary generators of cellular ROS (Lenaz, 2001), we asked  
169 whether the elevated levels of cytoplasmic ROS observed in *pappaa<sup>p170</sup>* hair cells originated from the  
170 mitochondria. We evaluated mitochondrial ROS with the live fluorescent indicator mitoSOX  
171 (Esterberg et al., 2016), again without neomycin treatment, and observed increased signal in hair cells  
172 of *pappaa<sup>p170</sup>* compared to wild type (Fig 4e-f). This increased mitochondrial ROS was not due to an  
173 overabundance of mitochondria within *pappaa<sup>p170</sup>* hair cells (Fig. S3a-b).

174 We hypothesized that the elevated ROS in *pappaa<sup>p170</sup>* hair cells predisposed them closer to a  
175 cytotoxic threshold of oxidative stress that results in cell death. To test this idea, we asked whether  
176 *pappaa<sup>p170</sup>* hair cells were more sensitive to pharmacological stimulation of mitochondrial ROS. To



177 stimulate ROS, we exposed wild type and *pappaa*<sup>p170</sup> larvae to Antimycin A, an inhibitor of the  
178 mitochondrial electron transport chain (Hoegger et al., 2008; Quinlan et al., 2011) We found that  
179 *pappaa*<sup>p170</sup> hair cells were more susceptible to death by Antimycin A than wild type hair cells (Fig 4g).  
180 We next asked whether the increased mitochondria-generated ROS levels in *pappaa*<sup>p170</sup> hair cells  
181 underlies their vulnerability to death. We hypothesized that if this were the case, then reducing  
182 mitochondrial-ROS would suppress their increased sensitivity to neomycin. To test this idea we  
183 exposed *pappaa*<sup>p170</sup> larvae to the mitochondria-targeted ROS scavenger mitoTEMPO (Esterberg et al.,  
184 2016) and observed up to complete protection of *pappaa*<sup>p170</sup> hair cells against neomycin-induced death  
185 (Fig 4h). These results suggest that abnormally elevated mitochondrial ROS underlies hair cell death in  
186 *pappaa*<sup>p170</sup>.

187

### 188 **Pappaa regulates mitochondrial Ca<sup>2+</sup> uptake and transmembrane potential**

189 Mitochondrial ROS production is stimulated by Ca<sup>2+</sup> entry into the mitochondria (Brookes et al.,  
190 2004; Gorlach et al., 2015). Given the increased mitochondrial ROS in *pappaa*<sup>p170</sup> hair cells, we asked  
191 whether the mutants' hair cell mitochondria exhibited increased Ca<sup>2+</sup> levels. To address this, we used a  
192 transgenic line *Tg(myo6b:mitoGCaMP3)*, in which a mitochondria-targeted genetically encoded Ca<sup>2+</sup>  
193 indicator (*GCaMP3*) is expressed in hair cells (Esterberg et al., 2014). Live imaging of mitoGCaMP3  
194 fluorescence revealed a doubling in fluorescent intensity in *pappaa*<sup>p170</sup> hair cells compared to wild type  
195 hair cells (Fig 5a-b). Mitochondrial Ca<sup>2+</sup> uptake is driven by the negative electrochemical gradient of  
196 the mitochondrial transmembrane potential, a product of mitochondrial respiration. Ca<sup>2+</sup>-induced  
197 stimulation of mitochondrial oxidative phosphorylation causes further hyperpolarization of  
198 mitochondrial transmembrane potential, leading to increased uptake of Ca<sup>2+</sup> (Brookes et al., 2004;  
199 Adam-Vizi and Starkov, 2010; Ivannikov and Macleod, 2013; Esterberg et al., 2014; Gorlach et al.,  
200 2015). Therefore, we hypothesized that *pappaa*<sup>p170</sup> mitochondria would have a more negative

201 transmembrane potential compared to wild type. Using the potentiometric probe TMRE that provides a  
202 fluorescent readout of mitochondrial transmembrane potential (Perry et al., 2011), we found that  
203 *pappaa*<sup>p170</sup> mitochondria possess a more negative transmembrane potential compared to wild type (Fig  
204 5c-d). This result is consistent with the *pappaa*<sup>p170</sup> mitochondria's increased Ca<sup>2+</sup> load. Given that  
205 mitochondria of *pappaa*<sup>p170</sup> hair cells exhibit elevated Ca<sup>2+</sup> (Fig 5a-b) and a more negative  
206 transmembrane potential (Fig 5c-d) at baseline, we hypothesized that pharmacologically disrupting  
207 these mitochondrial features would have a more cytotoxic effect on *pappaa*<sup>p170</sup> hair cells. To test this  
208 idea, we exposed wild type and *pappaa*<sup>p170</sup> larvae to Cyclosporin A (CsA), an inhibitor of the  
209 mitochondrial permeability transition pore that causes buildup of mitochondrial Ca<sup>2+</sup> and further  
210 hyperpolarizes mitochondria (Crompton et al., 1988; Esterberg et al., 2014). *pappaa*<sup>p170</sup> larvae showed  
211 reduced hair cell survival at concentrations of CsA, which had no effect on hair cell survival in wild  
212 type larvae (Fig 5e). Taken together, these results suggest that Pappaa regulates mitochondrial ROS  
213 production by attenuating mitochondrial Ca<sup>2+</sup> uptake.

214

### 215 **Pappaa deficient motor neurons show degeneration and oxidative stress**

216 We were curious to know whether Pappaa promotes the survival of other neuron types by  
217 attenuating oxidative stress. To address this, we evaluated the number of spinal motor neurons in wild  
218 type and *pappaa*<sup>p170</sup> larvae at 5 and 9 dpf. Using the *Tg(mnx1:GFP)* line to count motor neurons, we  
219 observed a reduced number of motor neurons and thinning of the ventral projecting motor nerve in 9  
220 dpf *pappaa*<sup>p170</sup> larvae (Fig 6a-c). To determine whether *pappaa*<sup>p170</sup> motor neurons also exhibit  
221 oxidative stress we analyzed antioxidant gene expression in motor neurons by RT-qPCR. An increase  
222 in antioxidant gene expression is an adaptive response to elevated ROS (Gorrini et al., 2013; Syu et al.,  
223 2016). qPCR of cDNA from fluorescently sorted *Tg(mnx1:GFP)* motor neurons revealed increased  
224 expression of several antioxidant genes (*gpx*, *sod2*, and *catalase*) in *pappaa*<sup>p170</sup> compared to wild type

225 (Fig 6d). Taken together, these results reveal that Pappaa's influence on oxidative stress and survival  
226 affects multiple neuron types.

227

## 228 **Discussion**

229 The precise regulation of mitochondrial function and ROS production is essential for neuron  
230 survival. Indeed, mitochondrial dysfunction, and the ensuing overproduction of ROS is causative of  
231 neuron death (Lin and Beal, 2006). Extracellular molecular factors produced by neurons or non-  
232 neuronal cells are known to influence neuron survival (Hasan et al., 2003; Li et al., 2009; Wang et al.,  
233 2013; Genis et al., 2014). Yet it remains poorly understood which of these factors support neuron  
234 survival by affecting mitochondrial function and ROS production. Here, through zebrafish mutant  
235 analysis, we reveal a novel extracellular regulator of neuron survival and mitochondrial function: the  
236 secreted metalloprotease Pappaa. Based on a series of *in vivo* experiments we propose a model by  
237 which Pappaa stimulates IGF1 receptor signaling in neurons to control mitochondrial function and  
238 ROS production, and thereby, promote neuron survival.

### 239 **Pappaa-IGF1 receptor signaling is required for neuron survival**

240 Pappaa's requirement for neuron survival is demonstrated by a precocious loss of sensory hair cells  
241 and spinal motor neurons in *pappaa<sup>p170</sup>* zebrafish larvae. Neuron loss was spontaneous for both  
242 populations (Figs 1e and 6a-b), and the hair cell loss was accentuated by exposure to mitochondrial  
243 toxins (Figs 4g and 5e). Pappaa's role in neuron survival is novel and therefore it is interesting to  
244 consider whether Pappaa serves this role by promoting neuronal development, maintenance, and/or  
245 regeneration. In the *pappaa<sup>p170</sup>* mutants, both hair cells and motor neurons appeared to develop  
246 normally, based on their numbers and cellular morphology in 5 dpf larvae. At 5 dpf, larvae require  
247 these neurons for various behaviors, including eliciting an acoustic startle response (Bang et al., 2002;  
248 Wolman et al., 2015). Although *pappaa<sup>p170</sup>* mutant larvae show deficits in startle modulation, we have

249 previously shown that at 5 dpf the mutants have the ability to detect acoustic stimuli and perform  
250 explosive escape maneuvers (Wolman et al., 2015). This ability further suggests that *pappaa*<sup>p170</sup> mutant  
251 hair cells and motor neurons were functionally intact prior to the onset of their loss, and therefore  
252 developed normally. In zebrafish, both hair cells and spinal motor neurons are capable of regeneration  
253 (Thomas et al., 2015; Ohnmacht et al., 2016). Therefore, albeit unprecedented, it is possible that these  
254 neurons naturally die at the rate we observed in *pappaa*<sup>p170</sup> mutants, but then require Pappaa to  
255 regenerate. This possibility is unlikely given our observation that hair cells in *pappaa*<sup>p170</sup> mutants  
256 showed a normal regenerative capacity after neomycin-induced loss (S2 Fig). Taken together, these  
257 results suggest that Pappaa is dispensable for the development and regeneration of hair cells and spinal  
258 motor neurons, and rather, supports their maintenance.

259 Increased IGF1 signaling has been shown to provide neuroprotection (Zheng et al., 2000). For  
260 example, exogenously supplied IGF1 was recently demonstrated to protect hair cells from neomycin-  
261 induced damage (Hayashi et al., 2013). However, it is poorly understood how endogenous IGF1  
262 signaling is regulated to promote neuron survival, particularly through extracellular factors. Pappaa is a  
263 secreted metalloprotease that cleaves the inhibitory IGF binding proteins, thereby freeing IGF-1 to  
264 bind and activate cell-surface IGF1 receptors. Thus, Pappaa acts as an extracellular positive regulator  
265 of IGF-1 signaling (Boldt and Conover, 2007). Consistent with this role for Pappaa, immunolabeling  
266 of activated, phosphorylated IGF1Rs was reduced on hair cells of 5 dpf *pappaa*<sup>p170</sup> mutants (Fig 3a-c).  
267 Stimulation of IGF1R signaling, either by supplementation of IGF1 or by stimulation of the IGF1R  
268 effector Akt, suppressed hair cell loss in *pappaa*<sup>p170</sup> mutants (Fig 3e-f). Notably, stimulation of IGF1R  
269 signaling after the hair cells had developed was sufficient to suppress this loss, which is consistent with  
270 a post-developmental role for Pappaa in regulating hair cell survival.

271 For hair cells and motor neurons, *pappaa* expression suggests that Pappaa can act in a paracrine or  
272 autocrine manner, respectively, to promote neuron survival. Although hair cells require Pappaa for

273 survival, they do not express Pappaa. Rather, their surrounding support cells, expressed *pappaa* (Fig  
274 2a-c). These support cells have been demonstrated to secrete factors that promote hair cell survival  
275 (May et al., 2013) and our results suggest that Pappaa is one such factor. In contrast to hair cells,  
276 *pappaa* is expressed by the spinal motor neurons that require Pappaa for survival (Figs 2a, 2c, and 6a-  
277 b), suggesting an autocrine function. Our analysis has not excluded that neighboring spinal neurons  
278 might also provide a Pappaa source for motor neurons. It remains unclear whether motor neuron-  
279 secreted Pappaa also promotes the survival of other spinal neuron types. We speculate that it does  
280 given the relative ubiquity of neuronal IGF1R expression and the need for all spinal neurons to  
281 regulate mitochondrial activity. To understand Pappaa's cell autonomy it will be necessary to define  
282 what triggers Pappaa activity to promote neuron survival. Is Pappaa acting in response to cues from  
283 dying neurons, and what are these cues, or is Pappaa serving a preventative role?

#### 284 **Pappaa regulates mitochondrial function in neurons**

285 The mitochondria in *pappaa*<sup>p170</sup> mutant hair cells showed multiple signs of dysfunction, including  
286 elevated ROS (Fig 4c-f), transmembrane potential (Fig 5c-d), and Ca<sup>2+</sup> load (Fig 5a-b). Consistent with  
287 these observations, reduced IGF1 signaling has been associated with increased ROS production and  
288 oxidative stress (García-Fernández et al., 2008; Lyons et al., 2017). Two lines of evidence suggest that  
289 mitochondrial dysfunction, and particularly the elevated ROS production, underlie neuron loss in  
290 *pappaa*<sup>p170</sup> mutants. First, *pappaa*<sup>p170</sup> hair cells showed enhanced sensitivity to pharmacological  
291 stimulators of mitochondrial ROS production (Figs 4g and 5e). Second, attenuation of mitochondrial  
292 ROS by mitoTEMPO exposure, a mitochondrial targeted antioxidant, was sufficient to suppress  
293 neomycin-induced hair cell loss in *pappaa*<sup>p170</sup> mutants (Fig 4h).

294 Based on results presented here, it is difficult to pinpoint the exact locus of mitochondrial  
295 dysfunction in *pappaa*<sup>p170</sup> neurons due to the tight interplay between mitochondrial transmembrane  
296 potential, Ca<sup>2+</sup> load, and ROS production (Brookes et al., 2004; Adam-Vizi and Starkov, 2010;

297 Ivannikov and Macleod, 2013; Esterberg et al., 2014; Gorlach et al., 2015). The oxidative  
298 phosphorylation process that generates ROS relies on maintaining a negative mitochondrial  
299 transmembrane potential. Negative transmembrane potential is achieved by pumping protons out of the  
300 mitochondrial matrix as electrons move across the electron transport chain. Protons then move down  
301 the electrochemical gradient through ATP synthase to produce ATP. Given that ROS is a byproduct of  
302 oxidative phosphorylation, a more negative transmembrane potential yields more ROS (Kann and  
303 Kovács, 2007; Zorov et al., 2014). Mitochondrial  $\text{Ca}^{2+}$  is a key regulator of transmembrane potential  
304 and the resultant ROS generation, as it stimulates the activity of key enzymes involved in oxidative  
305 phosphorylation (Brookes et al., 2004). And,  $\text{Ca}^{2+}$  uptake by the mitochondria is driven by the  
306 electrochemical gradient of a negative transmembrane potential. Thus,  $\text{Ca}^{2+}$  and transmembrane  
307 potential are locked in a feedback loop (Brookes et al., 2004; Adam-Vizi and Starkov, 2010; Ivannikov  
308 and Macleod, 2013; Esterberg et al., 2014; Gorlach et al., 2015). Because mitochondria in *pappaa<sup>p170</sup>*  
309 hair cells have a more negative transmembrane potential (Fig 5c-d) and experience  $\text{Ca}^{2+}$  overload (Fig  
310 5a-b), this likely sensitizes the mitochondria to any further increase in  $\text{Ca}^{2+}$  levels. In support of this,  
311 *pappaa<sup>p170</sup>* hair cells were hypersensitive to Cyclosporin A (Fig 5e), which increases mitochondrial  
312  $\text{Ca}^{2+}$  levels by blocking the mitochondrial permeability transition pore (Smaili and Russell, 1999).

313 It is possible that the *pappaa<sup>p170</sup>* neurons dysfunctional mitochondria are downstream effects of  
314 anomalies in cellular mechanisms acting outside of the mitochondria. A potential driver of the  
315 excessive mitochondrial  $\text{Ca}^{2+}$  levels and ROS production in *pappaa<sup>p170</sup>* hair cells is the endoplasmic  
316 reticulum (ER). ER and mitochondria are structurally coupled to facilitate rapid and efficient transfer  
317 of  $\text{Ca}^{2+}$  (Esterberg et al., 2014; Krols et al., 2016). Neomycin, to which the *pappaa<sup>p170</sup>* neurons showed  
318 hypersensitivity, stimulates this transfer (Esterberg et al., 2014). ER-mitochondria  $\text{Ca}^{2+}$  transfer can be  
319 enhanced by ER stress (Bravo et al., 2012). A cause of ER stress is disruption to ER-mediated protein  
320 processing mechanisms. In addition to playing a key role in buffering neuronal  $\text{Ca}^{2+}$ , the ER lumen is a

321 major site for protein processing, including protein folding. Nascent proteins enter the ER to be folded  
322 with the aid of molecular chaperones. Insufficient folding yields an accumulation of misfolded  
323 proteins, which triggers efflux of  $\text{Ca}^{2+}$  (Deniaud et al., 2008; Houck et al., 2012). IGF1 signaling has  
324 been shown to promote the ER's protein folding capacity, and thereby attenuate ER stress (Barati et  
325 al., 2006; Novosyadlyy et al., 2008; Chatterjee et al., 2013). Notably, this relationship between the ER  
326 and mitochondria that governs  $\text{Ca}^{2+}$  transfer is not unidirectional. Mitochondria-generated ROS can  
327 modulate the activity of ER  $\text{Ca}^{2+}$  channels and cause ER  $\text{Ca}^{2+}$  efflux that further stimulates  
328 mitochondrial ROS production (Peng and Jou, 2010; Gorlach et al., 2015). Given that many ER-  
329 resident molecular chaperones are  $\text{Ca}^{2+}$ -dependent (Gidalevitz et al., 2013), protein misfolding can be  
330 both a cause and a consequence of ER- $\text{Ca}^{2+}$  depletion. Further experimental dissections of ER  
331 mediated functions and the interactions between the ER and mitochondria in *pappaa<sup>p17</sup>* mutant neurons  
332 are needed to define the primary locus within neurons by which Pappaa-IGF1 signaling influences  
333 neuron survival.

334 Here, we define a novel role for Pappaa in neuron survival by stimulating the IGF1 signaling  
335 pathway and regulating mitochondrial function. The evidence we present is consistent with  
336 demonstrations that IGF1 regulates neuron survival and mitochondrial function (Zheng et al., 2000;  
337 Luo et al., 2003; García-Fernández et al., 2008; Lyons et al., 2017). Our discovery of Pappaa in this  
338 context breathes hope into the potential for IGF1 mediated therapies for neurodegenerative diseases.  
339 Unfortunately, patients with neurodegenerative disorders have not shown significant symptomatic  
340 improvement following systemic IGF1 administration. These disappointing outcomes are thought to be  
341 due to the suppressive effects of IGFBPs on IGF1 bioavailability (Raoul and Aebischer, 2004;  
342 Sakowski et al., 2009). In support of this, patients with ALS exhibit normal total levels of IGF1, while  
343 free IGF1 was reduced likely due to the upregulation of IGFBPs (Wilczak et al., 2003). Furthermore,  
344 the ubiquitous nature and broad cellular impact of IGF1 signaling presents a major challenge for a

345 therapy based on enhancing systemic IGF1 (Joseph D'Ercole and Ye, 2008). Temporal and spatial  
346 restrictions to IGF1 signaling may yield better outcomes. As a local, upstream regulator of IGF1  
347 signaling with restricted spatial expression, Pappaa may be a viable target to locally stimulate IGF1  
348 signaling to combat neuron loss in disease.

349

## 350 **Materials and Methods**

### 351 **Maintenance of Zebrafish**

352 To generate *pappaa*<sup>+/+</sup> and *pappaa*<sup>p170</sup> larvae for experimentation, adult *pappaa*<sup>p170/+</sup> zebrafish (on a  
353 mixed Tubingen long-fin, WIK background) were crossed into the following transgenic zebrafish  
354 backgrounds: *Tg(brn3c:GFP)*<sup>s356t</sup>, *Tg(mnx1:GFP)*<sup>m15</sup>, and *Tg(myo6b:mitoGCaMP3)*<sup>w78</sup> and then  
355 incrossed. Embryonic and larval zebrafish were raised in E3 media (5 mM NaCl, 0.17 mM KCl, 0.33  
356 mM CaCl<sub>2</sub>, 0.33 mM MgSO<sub>4</sub>, pH adjusted to 6.8–6.9 with NaHCO<sub>3</sub>) at 29°C on a 14 hour/10 hour  
357 light/dark cycle through 5 days post fertilization (dpf) (Kimmel et al., 1995; Gyda et al., 2012). Larvae  
358 raised beyond 5 dpf were fed paramecia. All experiments were done on 4-12 dpf larvae. Genotyping of  
359 *pappaa*<sup>p170</sup> larvae was performed as previously described (Wolman et al., 2015).

### 360 **Pharmacology**

361 The following treatments were performed on *Tg(brn3c:GFP)* larvae through the addition of  
362 compounds to the larvae's E3 media at 5 dpf unless otherwise noted. Neomycin sulfate solution  
363 (Sigma-Aldrich) was added at 1-30 μM for 1 hour. Cyclosporin A (Abcam; dissolved in DMSO) was  
364 added at 0.3-3 μM for 1 hour. Antimycin A (Sigma-Aldrich; dissolved in DMSO) was added at 100-  
365 500 pM for 24 hours, beginning at 4 dpf. MitoTEMPO (Sigma-Aldrich; dissolved in DMSO) was  
366 added at 10-100 μM 30 minutes prior to a 1-hour exposure to 10 μM neomycin. To modulate IGF1  
367 signaling: larvae were pre-treated with NVP-AEW541 at 1-10 μM (Selleck; dissolved in DMSO),



368 SC79 at 1-3  $\mu\text{M}$  (Tocris Bioscience, dissolved in DMSO), or recombinant IGF1 at 1-30 ng/mL (Cell  
369 Sciences; dissolved in 10  $\mu\text{M}$  HCl) for 24 hours prior (beginning at 4 dpf) and then exposed to 1-10  
370  $\mu\text{M}$  neomycin for 1 hour on 5 dpf. Following each treatment period, larvae were washed 3 times with  
371 E3 and left to recover in E3 for 4 hours at 28°C before fixation with 4% paraformaldehyde (diluted to  
372 4% w/v in PBS from 16% w/v in 0.1M phosphate buffer, pH 7.4). For mitoTEMPO, NVP-AEW541,  
373 SC79, and IGF1 treatment, the compounds were re-added to the E3 media for the 4-hour recovery  
374 period post neomycin washout. Vehicle-treated controls were exposed to either 0.9% sodium chloride  
375 in E3 (neomycin control), E3 only (IGF1 control), or 1% DMSO in E3 for the remaining compounds.

### 376 **Hair cell survival**

377 Hair cell survival experiments were performed in *Tg(brn3c:GFP)* larvae where hair cells are  
378 marked by GFP. For each larva, hair cells were counted from the same 3 stereotypically positioned  
379 neuromasts (IO3, M2, and OP1) (Raible and Kruse, 2000) and averaged. The percent of surviving hair  
380 cells was calculated as: [(mean number of hair cells after treatment)/ (mean number of hair cells in  
381 vehicle treated group)] X 100. For analyses of neuron survival over time, we normalized the number of  
382 neurons counted at each timepoint to the number of neurons present at 5 dpf. Normalizations were  
383 genotype specific to account for a slight increase in hair cell number (~2 per neuromast) in *pappaa<sup>p170</sup>*  
384 larvae at 5 dpf.

### 385 **Single cell dissociation and fluorescence activated cell sorting**

386 For each genotype, 30 5 dpf *Tg(mnx1:GFP)* and 200 5 dpf *Tg(brn3c:GFP)* larvae were rinsed for  
387 15 minutes in Ringer's solution (116mM NaCl, 2.9 mM KCl, 1.8 mM CaCl<sub>2</sub>, 5 mM HEPES, pH  
388 7.2)(Guille, 1999). *pappaa<sup>p170</sup>* larvae were sorted by swim bladder(Wolman et al., 2015). To collect  
389 motor neurons we used whole *Tg(mnx1:GFP)* larvae and to collect hair cells we used tails dissected  
390 from *Tg(brn3c:GFP)* larvae. Samples were pooled into 1.5 mL tubes containing Ringer's solution on

391 ice, which was then replaced with 1.3 mL of 0.25% trypsin-EDTA for digestion. *Tg(mnx1:GFP)*  
392 samples were incubated for 90 minutes and *Tg(brn3c:GFP)* were incubated for 20 minutes. Samples  
393 were titrated gently by P1000 pipette tip every 15 minutes for motor neurons and every 5 minutes for  
394 hair cells. To stop cell digestion, 200 $\mu$ L of 30% FBS and 6 mM CaCl<sub>2</sub> in PBS solution (Steiner et al.,  
395 2014) was added, cells were centrifuged at 400g for 5 minutes at 4°C, the supernatant was removed,  
396 the cell pellet was rinsed with Ca<sup>2+</sup>-free Ringer's solution and centrifuged again. The cell pellet was  
397 then resuspended in 1X Ca<sup>2+</sup>-free Ringer's solution (116mM NaCl, 2.9 mM KCl, 5 mM HEPES, pH  
398 7.2) and kept on ice until sorting. Immediately before sorting, cells were filtered through a 40  $\mu$ m cell  
399 strainer and stained with DAPI. A two-gates sorting strategy was employed. DAPI was used to isolate  
400 live cells, followed by a forward scatter (FSC) and GFP gate to isolate GFP<sup>+</sup> cells. Sorted cells were  
401 collected into RNase-free tubes containing 500  $\mu$ L of TRIzol reagent (Invitrogen) for RNA extraction.

#### 402 **RNA extraction and RT-PCR**

403 Total RNA was extracted from whole larvae and FACS sorted motor neurons and hair cells using  
404 TRIzol. cDNA was synthesized using SuperScript II Reverse Transcriptase (Invitrogen). Real-time  
405 Quantitative PCR (RT-qPCR) was performed using Sso fast Eva Green Supermix (Biorad) in a  
406 StepOnePlus Real-Time PCR System (Applied Biosystems) based on manufacture recommendation.  
407 Reactions were run in triplicates containing cDNA from 50 ng of total RNA/reaction. The primer  
408 sequences for the antioxidant genes were previously described(Jin et al., 2010) and are as follows: For  
409 *sod1*, forward: GTCGTCTGGCTTGTGGAGTG and reverse: TGTCAGCGGGCTAGTGCTT; for  
410 *gpx*, forward: AGATGTCATTCCTGCACACG and reverse: AAGGAGAAGCTTCCTCAGCC; for  
411 *catalase*, forward: AGGGCAACTGGGATCTTACA and reverse: TTTATGGGACCAGACCTTGG.  
412 *b-actin* was used as an endogenous control with the following primer sequences: forward  
413 TACAGCTTCACCACCACAGC and reverse: AAGGAAGGCTGGAAGAGAGC(Wang et al., 2005).  
414 Cycling conditions were as follows: 1 min at 95°C, then 40 cycles of 15 sec at 95°C, followed by 1

415 min at 60°C (Jin et al., 2010): Relative quantification of gene expression was done using the  
416  $2^{-\Delta\Delta C_t}$  method (Livak and Schmittgen, 2001). PCR amplification for *pappaa* fragment was  
417 performed by using forward primer: AGACAGGGATGTGGAGTACG, and reverse primer:  
418 GTTGCAGACGACAGTACAGC. PCR conditions were as follows: 3 min at 94°C, followed by 40  
419 cycles of 94°C for 30 sec, 57°C for 1 min, and 70°C for 1 min<sup>(Wolman et al., 2015)</sup>. The PCR product was  
420 run on a 3% agarose gel.

## 421 **Live imaging**

422 All experiments were done on 5-6 dpf *pappaa*<sup>p170</sup> and *pappaa*<sup>+/+</sup> larvae at room temperature. Images  
423 were acquired with an Olympus Fluoview confocal laser scanning microscope (FV1000) using  
424 Fluoview software (FV10-ASW 4.2). To detect oxidative stress, *Tg(brn3c:GFP)* larvae were incubated  
425 in 10 μM CellROX Deep Red (ThermoFischer Scientific C10422; dissolved in DMSO) and 1 μM  
426 mitoSOX Red (ThermoFischer Scientific M36008; dissolved in DMSO) in E3 for 60 minutes and 30  
427 minutes, respectively. To detect transmembrane potential, *Tg(brn3c:GFP)* larvae were incubated in 25  
428 nM TMRE (ThermoFischer Scientific T669; dissolved in DMSO) for 20 minutes. To detect MET  
429 channel function, *Tg(brn3c:GFP)* larvae were incubated in 3 μM FM1-43 (ThermoFischer Scientific  
430 T3136; dissolved in DMSO) for 30 seconds. To measure mitochondrial mass, larvae were incubated in  
431 100 nM mitotracker green FM (ThermoFischer Scientific M7514; dissolved in DMSO) for 5 minutes.  
432 Following the incubation period, larvae were washed 3 times in E3, anesthetized in 0.002% tricaine  
433 (Sigma-Aldrich) in E3, and mounted as previously described (Stawicki et al., 2014). Fluorescent  
434 intensity of the reporter was measured using ImageJ by drawing regions of interest around hair cells of  
435 the neuromast from Z-stack summations. The corrected total cell fluorescence (CTCF) of each reporter  
436 was calculated using the following formula: Integrated Density - (Area of selected cells X Mean  
437 fluorescence of background) (McCloy et al., 2014). Relative fluorescent intensity was reported as the  
438 ratio to GFP fluorescence.

## 439 **Immunohistochemistry and in situ hybridization**

440 For whole-mount immunostaining, larvae at 5 dpf were fixed in 4% paraformaldehyde for 1 hour at  
441 room temperature. *Tg(mnx1:GFP)* larvae were permeabilized in collagenase (0.1% in PBS) for 4  
442 hours. Larvae were blocked for 1 hour at room temperature in incubation buffer (0.2% bovine serum  
443 albumin, 2% normal goat serum, 0.8% Triton-X, 1% DMSO, in PBS, pH 7.4). Larvae were incubated  
444 in primary antibodies in IB overnight at 4°C. Primary antibodies were as follows: phosphorylated  
445 IGF1R (anti-IGF1 receptor phospho Y1161, 1:100, rabbit IgG; Abcam), hair cells using  
446 *Tg(brn3c:GFP)* larvae (anti-GFP, 1:500, rabbit IgG; ThermoFisher Scientific), motor neurons using  
447 *Tg(mnx1:GFP)* larvae (anti-GFP, 1:500, rabbit IgG), and support cells (anti-SOX2 ab97959, 1:200,  
448 rabbit IgG; Abcam)(He et al., 2014). Following incubation of primary antibodies, larvae were  
449 incubated in fluorescently conjugated secondary antibodies in IB for 4 hours at room temperature.  
450 Secondary antibodies included AlexaFluor488-conjugated and AlexaFluor594-conjugated secondary  
451 antibodies (goat anti-mouse IgG and IgG1, goat anti-rabbit IgG, 1:500; ThermoFisher Scientific). After  
452 staining, larvae were mounted in 70% glycerol in PBS. Images were acquired with an Olympus  
453 Fluoview confocal laser scanning microscope (FV1000) using Fluoview software (FV10-ASW 4.2).

454 For whole-mount in situ hybridization: digoxigenin-UTP-labeled antisense riboprobes for *pappaa*  
455 (Wolman et al., 2015) were used as previously described (Halloran et al., 1999; Chalasani et al., 2007).  
456 Images of colorimetric *in situ* reactions were acquired using a Leica Fluorescence stereo microscope  
457 with a Leica DFC310 FX digital color camera. Images of fluorescent *in situ* reactions were acquired  
458 using an Olympus Fluoview confocal laser scanning microscope (FV1000).

## 459 **Statistics**

460 All data were analyzed using GraphPad Prism Software 7.0b (GraphPad Software Incorporated, La  
461 Jolla, Ca, USA). Prior to use of parametric statistics, the assumption of normality was tested using

462 Brown-Forsythe test and Bartlett's test. Parametric analyses were performed using an unpaired T-test  
463 with Welch's correction or ANOVAs with a Holm-Sidak correction. Data are presented as means  $\pm$   
464 standard error of the mean (SEM;  $n$  = sample size). Significance was set at  $p < 0.05$ .  $N$  for each  
465 experiment is detailed in the results and/or figure legends.

466

#### 467 **Author details**

#### 468 **Mroj Alassaf**

- 469 • Department of Integrative Biology. University of Wisconsin, Madison, Wisconsin, United States of  
470 America.
- 471 • Neuroscience Training Program. University of Wisconsin, Madison, Wisconsin, United States of  
472 America.

#### 473 **Contribution**

474 Conceptualization, Investigation, Data curation, Formal analysis, Writing – original draft preparation.

#### 475 **Competing interests**

476 No competing interests declared.

#### 477 **Emily Daykin**

478 Department of Integrative Biology. University of Wisconsin, Madison, Wisconsin, United States of  
479 America.

#### 480 **Contribution**

481 Data curation

482 **Competing interests**

483 No competing interests declared.

484 **Marc Wolman**

485 Department of Integrative Biology. University of Wisconsin, Madison, Wisconsin, United States of  
486 America.

487 **Contribution**

488 Conceptualization, Resources, Writing – review & editing, Supervision, Project administration,  
489 Funding acquisition.

490 **Competing interests**

491 No competing interests declared.

492 **Funding**

493 **Ministry of Education-Saudi Arabia**

- 494 • Mroj Alassaf

495 **University of Wisconsin Sophomore research fellowship and the College of Agricultural &**

496 **Life Sciences summer undergraduate research award**

- 497 • Emily Daykin

498 **Greater Milwaukee Foundation Shaw Scientist Award (133-AAA265).**

- 499 • Marc Wolman

500 The funders had no role in study design, data collection and interpretation, or the decision to submit  
501 the work for publication

## 502 Acknowledgments

503 The authors would like to thank Dr. David Raible (University of Washington-Seattle) for the  
504 *myo6b:mitoGCaMP3* fish line and Dr. Corinna Burger (University of Wisconsin Department of  
505 Neurology) for use of the RT-qPCR cyclers.

506

## 507 References

- 508 Adam-Vizi V, Starkov AA (2010) Calcium and mitochondrial reactive oxygen species generation: how  
509 to read the facts. *J Alzheimers Dis* 20 Suppl 2:S413-426.
- 510 Alharazneh A, Luk L, Huth M, Monfared A, Steyger PS, Cheng AG, Ricci AJ (2011) Functional hair  
511 cell mechanotransducer channels are required for aminoglycoside ototoxicity. *PLoS One*  
512 6:e22347.
- 513 Bang PI, Yelick PC, Malicki JJ, Sewell WF (2002) High-throughput behavioral screening method for  
514 detecting auditory response defects in zebrafish. *J Neurosci Methods* 118:177-187.
- 515 Barati MT, Rane MJ, Klein JB, McLeish KR (2006) A proteomic screen identified stress-induced  
516 chaperone proteins as targets of Akt phosphorylation in mesangial cells. *J Proteome Res*  
517 5:1636-1646.
- 518 Barber SC, Mead RJ, Shaw PJ (2006) Oxidative stress in ALS: a mechanism of neurodegeneration and  
519 a therapeutic target. *Biochim Biophys Acta* 1762:1051-1067.
- 520 Blesa J, Trigo-Damas I, Quiroga-Varela A, Jackson-Lewis VR (2015) Oxidative stress and Parkinson's  
521 disease. *Front Neuroanat* 9:91.
- 522 Boldt HB, Conover CA (2007) Pregnancy-associated plasma protein-A (PAPP-A): a local regulator of  
523 IGF bioavailability through cleavage of IGF-BPs. *Growth Horm IGF Res* 17:10-18.
- 524 Bondy C, Werner H, Roberts CT, LeRoith D (1992) Cellular pattern of type-I insulin-like growth  
525 factor receptor gene expression during maturation of the rat brain: comparison with insulin-like  
526 growth factors I and II. *Neuroscience* 46:909-923.
- 527 Bravo R, Gutierrez T, Paredes F, Gatica D, Rodriguez AE, Pedrozo Z, Chiong M, Parra V, Quest AF,  
528 Rothermel BA, Lavandero S (2012) Endoplasmic reticulum: ER stress regulates mitochondrial  
529 bioenergetics. *Int J Biochem Cell Biol* 44:16-20.
- 530 Brookes PS, Yoon Y, Robotham JL, Anders MW, Sheu SS (2004) Calcium, ATP, and ROS: a  
531 mitochondrial love-hate triangle. *Am J Physiol Cell Physiol* 287:C817-833.
- 532 Chablais F, Jazwinska A (2010) IGF signaling between blastema and wound epidermis is required for  
533 fin regeneration. *Development* 137:871-879.
- 534 Chalasani SH, Sabol A, Xu H, Gyda MA, Rasband K, Granato M, Chien CB, Raper JA (2007) Stromal  
535 cell-derived factor-1 antagonizes slit/robo signaling in vivo. *J Neurosci* 27:973-980.
- 536 Chatterjee M, Andrulis M, Stühmer T, Müller E, Hofmann C, Steinbrunn T, Heimberger T, Schraud H,  
537 Kressmann S, Einsele H, Bargou RC (2013) The PI3K/Akt signaling pathway regulates the

- 538 expression of Hsp70, which critically contributes to Hsp90-chaperone function and tumor cell  
539 survival in multiple myeloma. *Haematologica* 98:1132-1141.
- 540 Crompton M, Ellinger H, Costi A (1988) Inhibition by cyclosporin A of a Ca<sup>2+</sup>-dependent pore in  
541 heart mitochondria activated by inorganic phosphate and oxidative stress. *Biochem J* 255:357-  
542 360.
- 543 Deniaud A, Sharaf el dein O, Maillier E, Poncet D, Kroemer G, Lemaire C, Brenner C (2008)  
544 Endoplasmic reticulum stress induces calcium-dependent permeability transition, mitochondrial  
545 outer membrane permeabilization and apoptosis. *Oncogene* 27:285-299.
- 546 Esterberg R, Hailey DW, Rubel EW, Raible DW (2014) ER-mitochondrial calcium flow underlies  
547 vulnerability of mechanosensory hair cells to damage. *J Neurosci* 34:9703-9719.
- 548 Esterberg R, Linbo T, Pickett SB, Wu P, Ou HC, Rubel EW, Raible DW (2016) Mitochondrial calcium  
549 uptake underlies ROS generation during aminoglycoside-induced hair cell death. *J Clin Invest*  
550 126:3556-3566.
- 551 Feldman EL, Sullivan KA, Kim B, Russell JW (1997) Insulin-like growth factors regulate neuronal  
552 differentiation and survival. *Neurobiol Dis* 4:201-214.
- 553 García-Fernández M, Delgado G, Puche JE, González-Barón S, Castilla Cortázar I (2008) Low doses  
554 of insulin-like growth factor I improve insulin resistance, lipid metabolism, and oxidative  
555 damage in aging rats. *Endocrinology* 149:2433-2442.
- 556 Genis L, Dávila D, Fernandez S, Pozo-Rodríguez A, Martínez-Murillo R, Torres-Aleman I (2014)  
557 Astrocytes require insulin-like growth factor I to protect neurons against oxidative injury.  
558 *F1000Res* 3:28.
- 559 Ghysen A, Dambly-Chaudière C (2007) The lateral line microcosmos. *Genes Dev* 21:2118-2130.
- 560 Gidalevitz T, Stevens F, Argon Y (2013) Orchestration of secretory protein folding by ER chaperones.  
561 *Biochim Biophys Acta* 1833:2410-2424.
- 562 Golpich M, Amini E, Mohamed Z, Azman Ali R, Mohamed Ibrahim N, Ahmadiani A (2017)  
563 Mitochondrial Dysfunction and Biogenesis in Neurodegenerative diseases: Pathogenesis and  
564 Treatment. *CNS Neurosci Ther* 23:5-22.
- 565 Gorlach A, Bertram K, Hudecova S, Krizanova O (2015) Calcium and ROS: A mutual interplay.  
566 *Redox Biol* 6:260-271.
- 567 Gorrini C, Harris IS, Mak TW (2013) Modulation of oxidative stress as an anticancer strategy. *Nat Rev*  
568 *Drug Discov* 12:931-947.
- 569 Guille M (1999) Molecular methods in developmental biology : *Xenopus* and zebrafish. Totowa, N.J.:  
570 Humana Press.
- 571 Gyda M, Wolman M, Lorent K, Granato M (2012) The tumor suppressor gene retinoblastoma-1 is  
572 required for retinotectal development and visual function in zebrafish. *PLoS Genet* 8:e1003106.
- 573 Halliwell B (1992) Reactive oxygen species and the central nervous system. *J Neurochem* 59:1609-  
574 1623.
- 575 Halliwell B (2006) Oxidative stress and neurodegeneration: where are we now? *J Neurochem* 97:1634-  
576 1658.
- 577 Halloran MC, Severance SM, Yee CS, Gemza DL, Raper JA, Kuwada JY (1999) Analysis of a  
578 Zebrafish semaphorin reveals potential functions in vivo. *Dev Dyn* 214:13-25.
- 579 Hammerman MR (1987) Insulin-like growth factors and aging. *Endocrinol Metab Clin North Am*  
580 16:995-1011.
- 581 Harris JA, Cheng AG, Cunningham LL, MacDonald G, Raible DW, Rubel EW (2003) Neomycin-  
582 induced hair cell death and rapid regeneration in the lateral line of zebrafish (*Danio rerio*). *J*  
583 *Assoc Res Otolaryngol* 4:219-234.
- 584 Hasan W, Pedchenko T, Krizsan-Agbas D, Baum L, Smith PG (2003) Sympathetic neurons synthesize  
585 and secrete pro-nerve growth factor protein. *J Neurobiol* 57:38-53.



- 586 Hayashi Y, Yamamoto N, Nakagawa T, Ito J (2013) Insulin-like growth factor 1 inhibits hair cell  
587 apoptosis and promotes the cell cycle of supporting cells by activating different downstream  
588 cascades after pharmacological hair cell injury in neonatal mice. *Mol Cell Neurosci* 56:29-38.
- 589 He Y, Cai C, Tang D, Sun S, Li H (2014) Effect of histone deacetylase inhibitors trichostatin A and  
590 valproic acid on hair cell regeneration in zebrafish lateral line neuromasts. *Front Cell Neurosci*  
591 8:382.
- 592 Hoegger MJ, Lieven CJ, Levin LA (2008) Differential production of superoxide by neuronal  
593 mitochondria. *BMC Neurosci* 9:4.
- 594 Houck SA, Singh S, Cyr DM (2012) Cellular responses to misfolded proteins and protein aggregates.  
595 *Methods Mol Biol* 832:455-461.
- 596 Howarth C, Gleeson P, Attwell D (2012) Updated energy budgets for neural computation in the  
597 neocortex and cerebellum. *J Cereb Blood Flow Metab* 32:1222-1232.
- 598 Hwa V, Oh Y, Rosenfeld RG (1999) The insulin-like growth factor-binding protein (IGFBP)  
599 superfamily. *Endocr Rev* 20:761-787.
- 600 Ivannikov MV, Macleod GT (2013) Mitochondrial free Ca<sup>2+</sup> levels and their effects on energy  
601 metabolism in *Drosophila* motor nerve terminals. *Biophys J* 104:2353-2361.
- 602 Jin Y, Zhang X, Shu L, Chen L, Sun L, Qian H, Liu W, Fu Z (2010) Oxidative stress response and  
603 gene expression with atrazine exposure in adult female zebrafish (*Danio rerio*). *Chemosphere*  
604 78:846-852.
- 605 Joseph D'Ercole A, Ye P (2008) Expanding the mind: insulin-like growth factor I and brain  
606 development. *Endocrinology* 149:5958-5962.
- 607 Kann O, Kovács R (2007) Mitochondria and neuronal activity. *Am J Physiol Cell Physiol* 292:C641-  
608 657.
- 609 Kimmel CB, Ballard WW, Kimmel SR, Ullmann B, Schilling TF (1995) Stages of embryonic  
610 development of the zebrafish. *Dev Dyn* 203:253-310.
- 611 Krols M, Bultynck G, Janssens S (2016) ER-Mitochondria contact sites: A new regulator of cellular  
612 calcium flux comes into play. *J Cell Biol* 214:367-370.
- 613 Laviola L, Natalicchio A, Giorgino F (2007) The IGF-I signaling pathway. *Current pharmaceutical*  
614 *design* 13:663-669.
- 615 Lenaz G (2001) The mitochondrial production of reactive oxygen species: mechanisms and  
616 implications in human pathology. *IUBMB Life* 52:159-164.
- 617 Li XZ, Bai LM, Yang YP, Luo WF, Hu WD, Chen JP, Mao CJ, Liu CF (2009) Effects of IL-6 secreted  
618 from astrocytes on the survival of dopaminergic neurons in lipopolysaccharide-induced  
619 inflammation. *Neurosci Res* 65:252-258.
- 620 Lin MT, Beal MF (2006) Mitochondrial dysfunction and oxidative stress in neurodegenerative  
621 diseases. *Nature* 443:787-795.
- 622 Livak KJ, Schmittgen TD (2001) Analysis of relative gene expression data using real-time quantitative  
623 PCR and the 2<sup>-Delta Delta C(T)</sup> Method. *Methods* 25:402-408.
- 624 Luo HR, Hattori H, Hossain MA, Hester L, Huang Y, Lee-Kwon W, Donowitz M, Nagata E, Snyder  
625 SH (2003) Akt as a mediator of cell death. *Proc Natl Acad Sci U S A* 100:11712-11717.
- 626 Lyons A, Coleman M, Riis S, Favre C, O'Flanagan CH, Zhdanov AV, Papkovsky DB, Hursting SD,  
627 O'Connor R (2017) Insulin-like growth factor 1 signaling is essential for mitochondrial  
628 biogenesis and mitophagy in cancer cells. *J Biol Chem* 292:16983-16998.
- 629 Mattson MP, Magnus T (2006) Ageing and neuronal vulnerability. *Nat Rev Neurosci* 7:278-294.
- 630 May LA, Kramarenko II, Brandon CS, Voelkel-Johnson C, Roy S, Truong K, Francis SP, Monzack  
631 EL, Lee FS, Cunningham LL (2013) Inner ear supporting cells protect hair cells by secreting  
632 HSP70. *J Clin Invest* 123:3577-3587.

- 633 McCloy RA, Rogers S, Caldon CE, Lorca T, Castro A, Burgess A (2014) Partial inhibition of Cdk1 in  
634 G 2 phase overrides the SAC and decouples mitotic events. *Cell Cycle* 13:1400-1412.
- 635 Meyers JR, MacDonald RB, Duggan A, Lenzi D, Standaert DG, Corwin JT, Corey DP (2003) Lighting  
636 up the senses: FM1-43 loading of sensory cells through nonselective ion channels. *J Neurosci*  
637 23:4054-4065.
- 638 Miller AH, Howe HB, Krause BM, Friedle SA, Banks MI, Perkins BD, Wolman MA (2018)  
639 Pregnancy-Associated Plasma Protein-aa Regulates Photoreceptor Synaptic Development to  
640 Mediate Visually Guided Behavior. *J Neurosci* 38:5220-5236.
- 641 Novosyadlyy R, Kurshan N, Lann D, Vijayakumar A, Yakar S, LeRoith D (2008) Insulin-like growth  
642 factor-I protects cells from ER stress-induced apoptosis via enhancement of the adaptive  
643 capacity of endoplasmic reticulum. *Cell Death Differ* 15:1304-1317.
- 644 Ohnmacht J, Yang Y, Maurer GW, Barreiro-Iglesias A, Tsarouchas TM, Wehner D, Sieger D, Becker  
645 CG, Becker T (2016) Spinal motor neurons are regenerated after mechanical lesion and genetic  
646 ablation in larval zebrafish. *Development* 143:1464-1474.
- 647 Peng TI, Jou MJ (2010) Oxidative stress caused by mitochondrial calcium overload. *Ann N Y Acad*  
648 *Sci* 1201:183-188.
- 649 Perry G, Cash AD, Smith MA (2002) Alzheimer Disease and Oxidative Stress. *J Biomed Biotechnol*  
650 2:120-123.
- 651 Perry SW, Norman JP, Barbieri J, Brown EB, Gelbard HA (2011) Mitochondrial membrane potential  
652 probes and the proton gradient: a practical usage guide. *Biotechniques* 50:98-115.
- 653 Quinlan CL, Treberg JR, Brand MD (2011) Chapter 3 - Mechanisms of Mitochondrial Free Radical  
654 Production and their Relationship to the Aging Process. In: *Handbook of the Biology of Aging*  
655 (Seventh Edition) (Masoro EJ, Austad SN, eds), pp 47-61. San Diego: Academic Press.
- 656 Raible DW, Kruse GJ (2000) Organization of the lateral line system in embryonic zebrafish. *The*  
657 *Journal of comparative neurology* 421:189-198.
- 658 Raoul C, Aebischer P (2004) ALS, IGF-1 and gene therapy: 'it's never too late to mend'. *Gene*  
659 *Therapy* 11:429.
- 660 Rastegar S, Hess I, Dickmeis T, Nicod JC, Ertzer R, Hadzhiev Y, Thies WG, Scherer G, Strähle U  
661 (2008) The words of the regulatory code are arranged in a variable manner in highly conserved  
662 enhancers. *Dev Biol* 318:366-377.
- 663 Sakowski SA, Schuyler AD, Feldman EL (2009) Insulin-like growth factor-I for the treatment of  
664 amyotrophic lateral sclerosis. *Amyotroph Lateral Scler* 10:63-73.
- 665 Schieber M, Chandel NS (2014) ROS function in redox signaling and oxidative stress. *Curr Biol*  
666 24:R453-462.
- 667 Schon EA, Manfredi G (2003) Neuronal degeneration and mitochondrial dysfunction. *J Clin Invest*  
668 111:303-312.
- 669 Sjögren K, Liu JL, Blad K, Skrtic S, Vidal O, Wallenius V, LeRoith D, Törnell J, Isaksson OG,  
670 Jansson JO, Ohlsson C (1999) Liver-derived insulin-like growth factor I (IGF-I) is the principal  
671 source of IGF-I in blood but is not required for postnatal body growth in mice. *Proc Natl Acad*  
672 *Sci U S A* 96:7088-7092.
- 673 Smaili SS, Russell JT (1999) Permeability transition pore regulates both mitochondrial membrane  
674 potential and agonist-evoked Ca<sup>2+</sup> signals in oligodendrocyte progenitors. *Cell Calcium*  
675 26:121-130.
- 676 Stawicki TM, Owens KN, Linbo T, Reinhart KE, Rubel EW, Raible DW (2014) The zebrafish  
677 merovingian mutant reveals a role for pH regulation in hair cell toxicity and function. *Dis*  
678 *Model Mech* 7:847-856.

- 679 Steiner AB, Kim T, Cabot V, Hudspeth AJ (2014) Dynamic gene expression by putative hair-cell  
680 progenitors during regeneration in the zebrafish lateral line. *Proc Natl Acad Sci U S A*  
681 111:E1393-1401.
- 682 Syu JP, Chi JT, Kung HN (2016) Nrf2 is the key to chemotherapy resistance in MCF7 breast cancer  
683 cells under hypoxia. *Oncotarget* 7:14659-14672.
- 684 Thomas ED, Cruz IA, Hailey DW, Raible DW (2015) There and back again: development and  
685 regeneration of the zebrafish lateral line system. *Wiley Interdiscip Rev Dev Biol* 4:1-16.
- 686 Wang J, Tang Y, Zhang W, Zhao H, Wang R, Yan Y, Xu L, Li P (2013) Insulin-like growth factor-1  
687 secreted by brain microvascular endothelial cells attenuates neuron injury upon ischemia. *FEBS*  
688 *J* 280:3658-3668.
- 689 Wang YX, Qian LX, Yu Z, Jiang Q, Dong YX, Liu XF, Yang XY, Zhong TP, Song HY (2005)  
690 Requirements of myocyte-specific enhancer factor 2A in zebrafish cardiac contractility. *FEBS*  
691 *Lett* 579:4843-4850.
- 692 Westwood AJ, Beiser A, Decarli C, Harris TB, Chen TC, He XM, Roubenoff R, Pikula A, Au R,  
693 Braverman LE, Wolf PA, Vasani RS, Seshadri S (2014) Insulin-like growth factor-1 and risk of  
694 Alzheimer dementia and brain atrophy. *Neurology* 82:1613-1619.
- 695 Wilczak N, de Vos RA, De Keyser J (2003) Free insulin-like growth factor (IGF)-I and IGF binding  
696 proteins 2, 5, and 6 in spinal motor neurons in amyotrophic lateral sclerosis. *Lancet* 361:1007-  
697 1011.
- 698 Wolman MA, Jain RA, Marsden KC, Bell H, Skinner J, Hayer KE, Hogenesch JB, Granato M (2015)  
699 A genome-wide screen identifies PAPP-AA-mediated IGF1R signaling as a novel regulator of  
700 habituation learning. *Neuron* 85:1200-1211.
- 701 Xiao T, Roeser T, Staub W, Baier H (2005) A GFP-based genetic screen reveals mutations that disrupt  
702 the architecture of the zebrafish retinotectal projection. *Development* 132:2955-2967.
- 703 Yoo EG, Lee WJ, Kim JH, Chae HW, Hyun SE, Kim DH, Kim HS, Oh Y (2011) Insulin-like growth  
704 factor-binding protein-3 mediates high glucose-induced apoptosis by increasing oxidative stress  
705 in proximal tubular epithelial cells. *Endocrinology* 152:3135-3142.
- 706 Zheng WH, Kar S, Doré S, Quirion R (2000) Insulin-like growth factor-1 (IGF-1): a neuroprotective  
707 trophic factor acting via the Akt kinase pathway. *J Neural Transm Suppl*:261-272.
- 708 Zorov DB, Juhaszova M, Sollott SJ (2014) Mitochondrial reactive oxygen species (ROS) and ROS-  
709 induced ROS release. *Physiol Rev* 94:909-950.

710

## 711 **Figures**

712 **Fig 1. Hair cell survival is reduced in zebrafish *pappaa*<sup>P170</sup> larvae.** (a) Schematic of lateral line  
713 neuromast. (b) *Brn3c:GFP* labeled hair cells clustered within a lateral line neuromast of wild type and  
714 *pappaa*<sup>P170</sup>. Scale = 10µm. (c) Mean percentage of surviving hair cells. To calculate hair cell survival  
715 percentage, hair cell number 4 hours post-neomycin treatment was normalized to mean hair cell  
716 number in vehicle treated larvae of the same genotype. \*\**p*<0.01, \*\*\**p*<0.001, two-way ANOVA,  
717 Holm-Sidak post test. N=13 larvae per group, 3 neuromasts/larva. (d) Representative images of  
718 *Brn3c:GFP* labeled hair cells from vehicle or 10µM neomycin treated larvae. Scale = 10µm. (e) Mean

719 percentage of hair cells at 7, 9, and 12 dpf. To calculate hair cell survival percentage, hair cell number  
720 at each time point was normalized to mean hair cell number at 5 dpf for a given genotype.  $*p < 0.05$ ,  
721  $***p < 0.001$ , two-way ANOVA, Holm-Sidak post test. N=8 larvae per group, 3 neuromasts/larva. Error  
722 bars=SEM.

723

724 **Fig 2. *pappaa* is expressed by neuromast support cells and motor neurons.** (a) Whole mount *in situ*  
725 hybridization shows *pappaa* mRNA expression at 4 dpf by lateral line neuromasts (arrowheads) and in  
726 the ventral spinal cord (arrows). Top image: dorsal view, bottom image: lateral view. (b) Fluorescent *in situ*  
727 hybridization of *pappaa* (magenta) and *Brn3c:GFP* labeled hair cells (green) shows *pappaa*  
728 mRNA expression by the support cells that surround hair cells. Scale = 10 $\mu$ m. (c) RT-PCR of  
729 fluorescently sorted *Brn3c:GFP* labeled hair cells and *mnx1:GFP* labeled motor neurons shows  
730 *pappaa* expression by motor neurons, but not hair cells.

731

732 **Fig 3. *Pappaa* - IGF1 signaling regulates hair cell survival.** (a) *Brn3c:GFP* marked hair cells  
733 (outlined) immunolabeled for phosphorylated IGF1R receptor. Scale = 10 $\mu$ m. (b-c) Mean pIGF1R  
734 immunofluorescence normalized to GFP immunofluorescence (b) and mean number of pIGF1R puncta  
735 (c) per hair cell cluster.  $*p < 0.05$ , unpaired *t* test, Welch-corrected. N= 8 larvae, 1-3 neuromasts/larva.  
736 (d-f) Mean percentage of surviving hair cells 4 hours post-neomycin treatment. To calculate hair cell  
737 survival percentage, hair cell counts in neomycin treated larvae were normalized to vehicle treated  
738 larvae of same genotype. (d) Wildtype larvae treated with the IGF1R antagonist NVP-AEW541. (e-f)  
739 *pappaa*<sup>P170</sup> larvae treated with SC79 (e) or recombinant IGF1 (f).  $*p < 0.05$ ,  $**p < 0.01$ ,  $***p < 0.001$ ,  
740  $****p < 0.0001$ . One-way ANOVA, Holm-Sidak post test. N=10 larvae, 3 neuromasts/larva. Error  
741 bars=SEM.

742

743 **Fig 4. Pappaa regulates mitochondrial ROS generation.** (a, c, e) Still images of live *Brn3c:GFP*  
744 hair cells loaded with the amphipathic styryl dye FM1-43 (a) or cytoplasmic or mitochondrial ROS  
745 indicators (c: CellROX, e: mitoSOX). Scale = 10 $\mu$ m. (b, d, f) Mean dye fluorescence normalized to  
746 GFP fluorescence. For b, N= 6 larvae, 2-4 neuromasts/larva. For d, N= 5-6 larvae per group, 2-6  
747 neuromasts/ larva. For f, N= 6 larvae per group, 2-4 neuromasts/ larva. \* $p$ <0.05. Unpaired  $t$  test,  
748 Welch-corrected. (g) Mean percentage of surviving hair cells post 24 hours incubation in antimycin A.  
749 To calculate hair cell survival percentage, hair cell counts after treatment were normalized to hair cell  
750 number in vehicle treated larvae of same genotype. \* $p$ <0.05 \*\*\*\* $p$ <0.0001. Two-way ANOVA, Holm-  
751 Sidak post test. N= 9-10 larvae, 3 neuromasts/larva. (h) Mean percentage of surviving *pappaa*<sup>p170</sup> hair  
752 cells following co-treatment with mitoTEMPO and neomycin. To calculate hair cell survival  
753 percentage, hair cell counts 4 hours post-neomycin treatment were normalized to hair cell counts in  
754 vehicle treated *pappaa*<sup>p170</sup> larvae. \*\*\*\* $p$ <0.0001. One-way ANOVA, Holm-Sidak post test. N=4-10  
755 larvae, 3 neuromasts/larva. Error bars=SEM.

756

757 **Fig 5. Mitochondrial Ca<sup>2+</sup> levels and transmembrane potential are disrupted in *pappaa*<sup>p170</sup> hair**  
758 **cells.** (a) Still images from live *myo6b:mitoGCaMP3* labeled hair cells. Scale = 10 $\mu$ m. (b) Mean  
759 mitoGCaMP fluorescence. \* $p$ <0.05. Unpaired  $t$  test, Welch-corrected. N= 4-6 larvae, 3-4  
760 neuromasts/larva. (c) Still images from live *Brn3c:GFP* labeled hair cells loaded with TMRE. Scale =  
761 10 $\mu$ m. (d) Mean TMRE fluorescence normalized to GFP fluorescence. N= 4 larvae, 3-4  
762 neuromasts/larva. \* $p$ <0.05. Unpaired  $t$  test, Welch-corrected. (e) Mean percentage of surviving hair  
763 cells post Cyclosporin A treatment. To calculate hair cell survival percentage, hair cell counts post-  
764 treatment were normalized to hair cell numbers in vehicle treated larvae of same genotype. \* $p$ <0.05,  
765 \*\* $p$ <0.01, \*\*\* $p$ <0.001. Two-way ANOVA, Holm-Sidak post test. N=8-13 larvae, 3 neuromasts/larva.  
766 Error bars=SEM.

767

768 **Fig 6. Pappaa-deficient spinal motor neurons die precociously.** (a) Mean number of *mnx1:GFP*  
769 labeled spinal motor neurons summed across 3 motor segments at 5 and 9 dpf.  $**p<0.01$ . Unpaired t-  
770 test, Welch corrected. N=6-8 larvae, 3 segments/ larva. (b-c) Representative images of *mnx1:GFP*  
771 labeled motor neurons (b) and nerves (c), captured with the spinal cord (c) and innervating the ventral  
772 myotome (c) of the same larvae. Scale = 100 $\mu$ m. (d) Mean fold change in antioxidants transcript  
773 expression levels in motor neurons at 5dpf. N= 3 technical replicates/gene.  $*p<0.05$ ,  $**p<0.01$ ,  
774  $***p<0.001$ . Unpaired *t* test, Welch-corrected. Error bars=SEM.

775

## 776 **Supporting information**

777 **S1 Fig. Support cells are not affected by neomycin treatment.** (a) Mean percentage of surviving  
778 neuromast support cells at 4 hours post-neomycin treatment. To calculate support cell survival  
779 percentage, support cell number 4 hours post-neomycin treatment was normalized to mean support cell  
780 number in vehicle treated larvae in the same genotype. Two-way ANOVA, Holm-Sidak post test  
781 revealed no significant difference among groups. N= 6-8 larvae per group, 3-4 neuromasts/ larva. Error  
782 bars = SEM. (b) Representative confocal images of *anti-SOX2* labeled support cells that were control  
783 or 30 $\mu$ M neomycin treated. Scale = 10 $\mu$ m.

784

785 **S2 Fig. *pappaa*<sup>p170</sup> hair cells regenerate and display normal gross morphology.** Mean percentage of  
786 hair cells in *pappaa*<sup>p170</sup> at 4, 24, and 48 hours following neomycin treatment at 5 dpf. To calculate hair  
787 cell percentage, hair cell number at each timepoint was normalized to mean hair cell number in vehicle  
788 treated larvae at 5 dpf. Error bars=SEM.

789

790 **S3 Fig. *pappaa*<sup>p170</sup> hair cells have normal mitochondrial mass.** (a) Still images from live wild type  
791 and *pappaa*<sup>p170</sup> hair cells loaded with the mitochondrial mass marker, Mitotracker. Scale = 10µm. (b)  
792 Mean mitotracker fluorescence. Unpaired *t* test with Welch correction revealed no significant  
793 difference among groups. N=3-5 neuromasts, 3-4 neuromasts/larva. Error bars=SEM.  
794

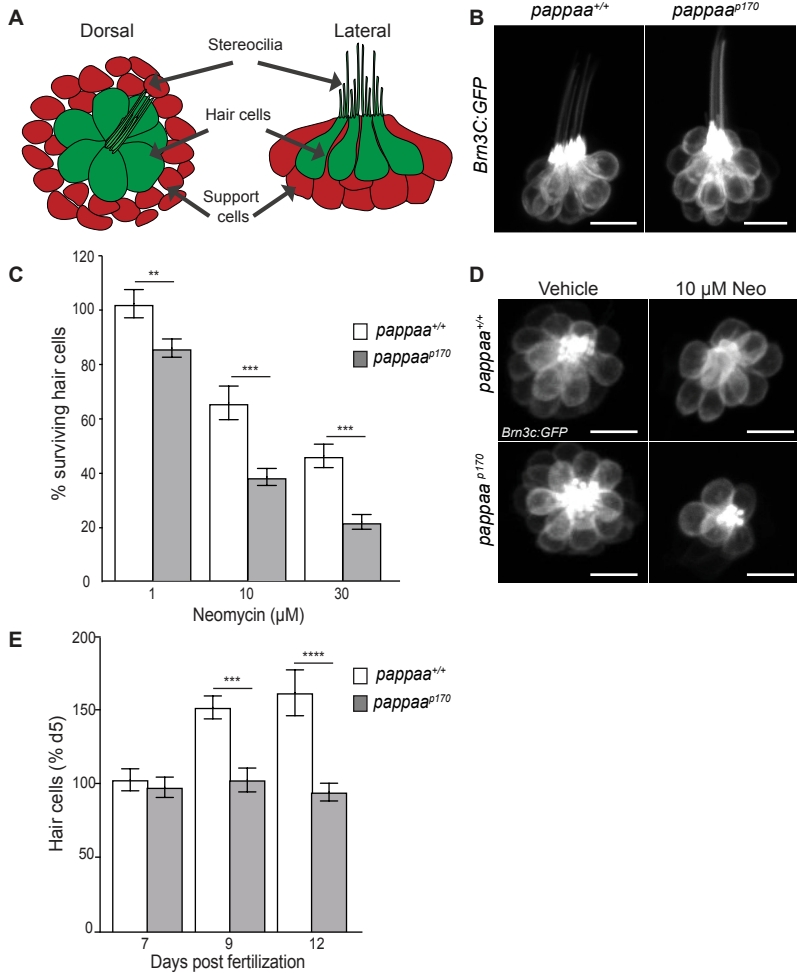

**Figure 1**



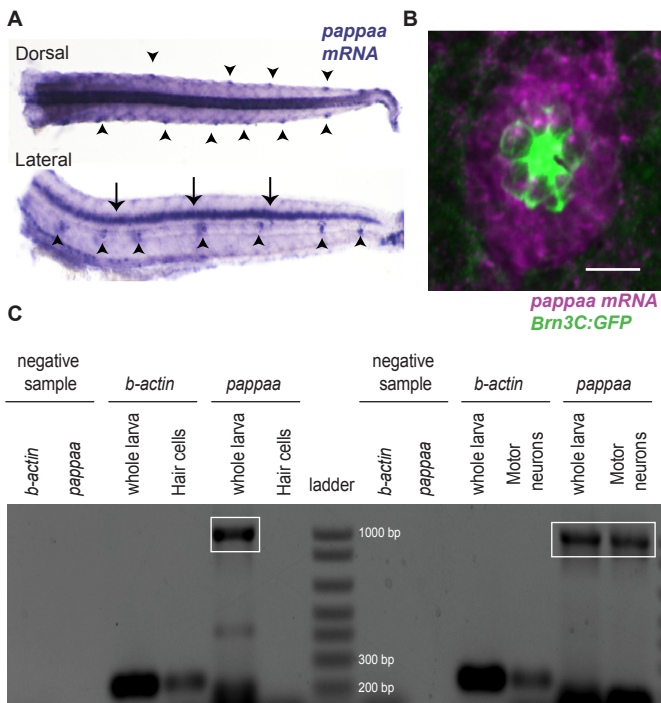

**Figure 2**

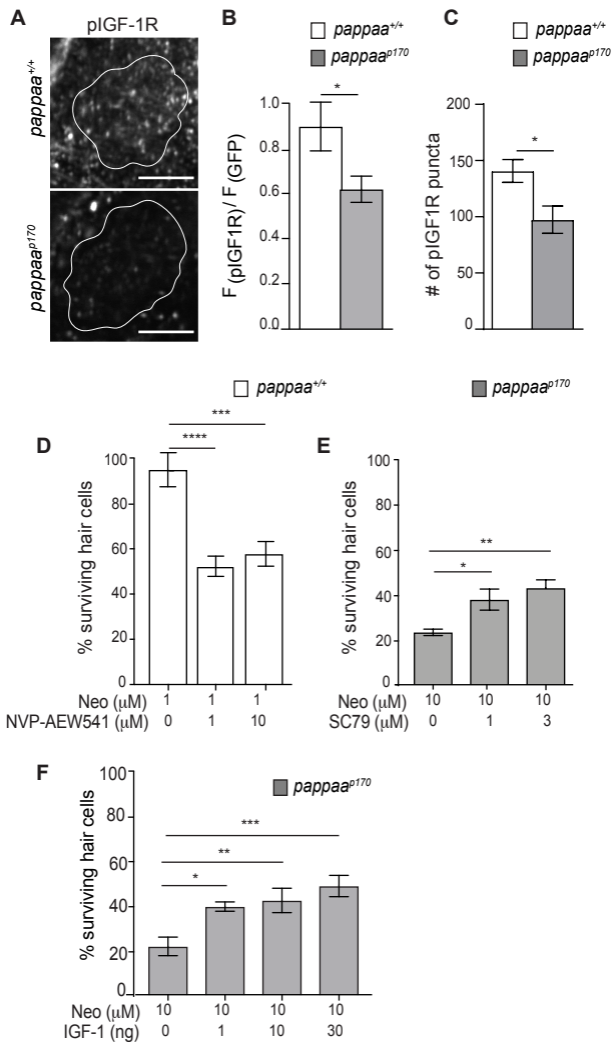

**Figure 3**

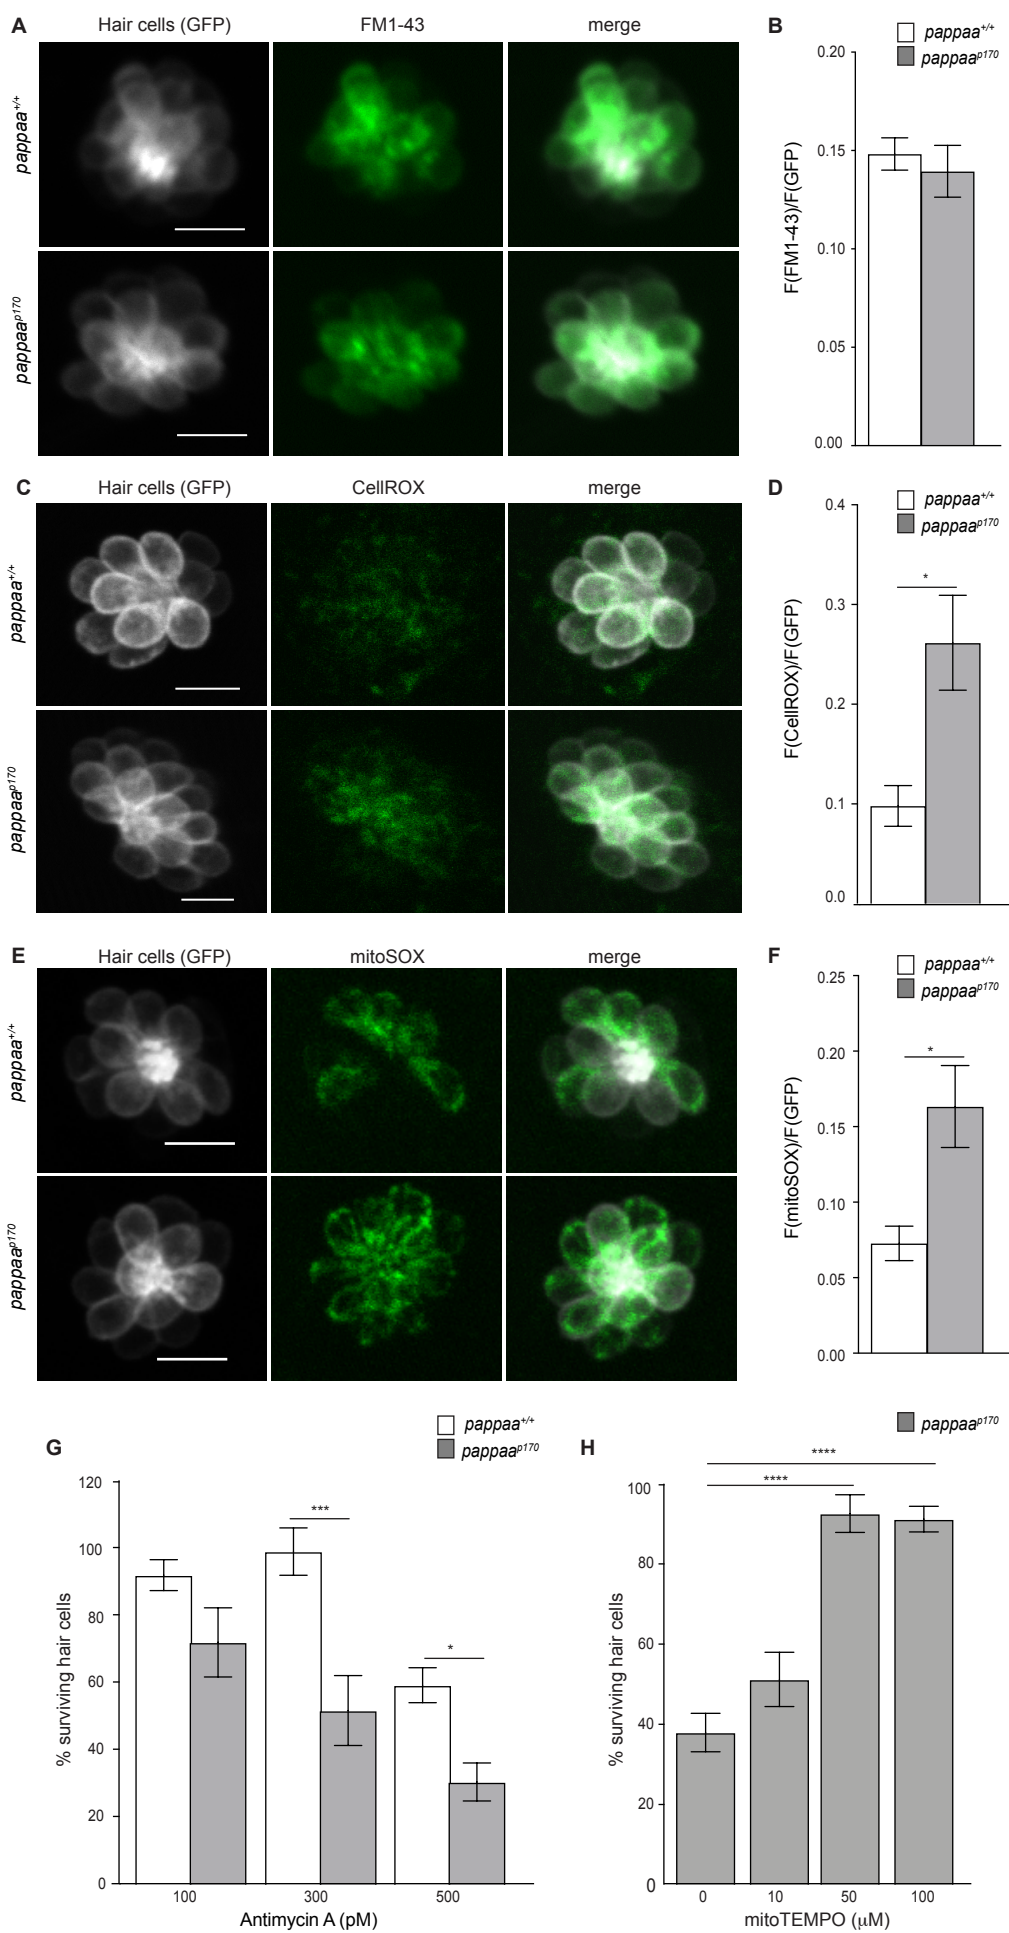

Figure 4

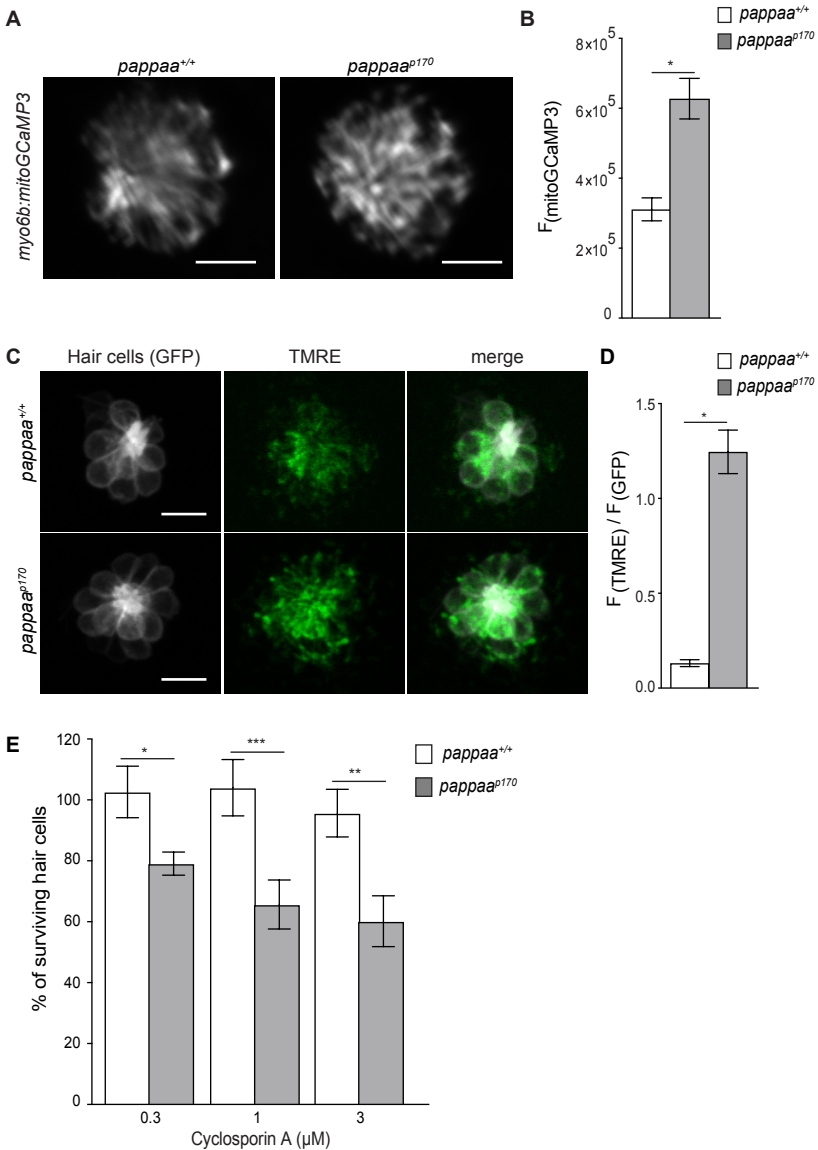

Figure 5

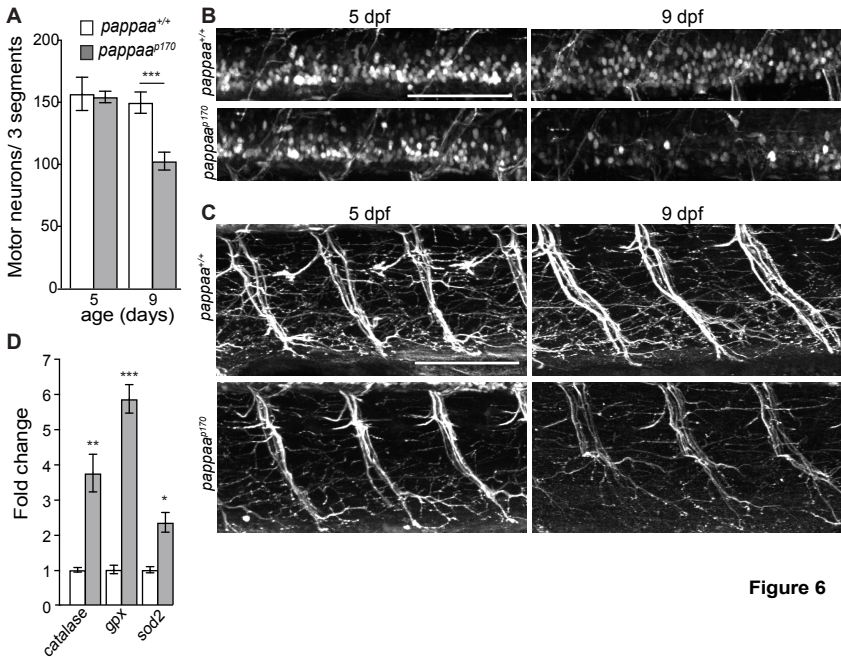

Source: https://www.biorxiv.org/content/10.1101/456632v1.full.pdf
